# Supplementary material for: Metabolic Syndrome Over 10 Years and Cognitive Functioning in Late Midlife
Source: Oxford University Press journal article supplement (doi:10.2337/dc09-1218), 2009-10-16
Supplement: dc09-1218_online_appendix.pdf [file dc09-1218_online_appendix.pdf]

## APPENDIX

Table A. Factors associated with occupational position at phase 7

|                                             | Occupational position |                 |             | P-value*          |
|---------------------------------------------|-----------------------|-----------------|-------------|-------------------|
|                                             | High (n=2104)         | Middle (n=1745) | Low (n=301) |                   |
| <b>Covariates</b>                           |                       |                 |             |                   |
| Sex, female, %                              | 14.3                  | 32.3            | 72.8        | <10 <sup>-4</sup> |
| Age in years, mean (SD)                     | 60.7 (5.8)            | 60.3 (6.0)      | 62.8 (5.9)  | <10 <sup>-4</sup> |
| Marital status, married or cohabited, %     | 85.0                  | 71.1            | 51.8        | <10 <sup>-4</sup> |
| Education, no academic qualification, %     | 1.3                   | 9.7             | 46.5        | <10 <sup>-4</sup> |
| Smoking habits, Current smokers, %          | 8.3                   | 13.1            | 16.9        | <10 <sup>-4</sup> |
| Alcohol consumption, > one drink per day, % | 59.2                  | 41.8            | 20.3        | <10 <sup>-4</sup> |
| Physical activity, low, %                   | 13.0                  | 14.6            | 26.9        | <10 <sup>-4</sup> |
| CHD prevalence, %                           | 6.1                   | 6.0             | 7.6         | 0.55              |
| Depressive symptoms, %                      | 9.2                   | 12.7            | 14.6        | 0.004             |
| <b>Metabolic syndrome over 10-year</b>      |                       |                 |             |                   |
| Persistent metabolic syndrome, %            | 6.6                   | 8.1             | 12.3        | 0.01              |
| Non persistent metabolic syndrome, %        | 10.1                  | 10.1            | 10.0        |                   |
| <b>Cognitive T-scores</b>                   |                       |                 |             |                   |
| Memory, mean (SD)                           | 51.2 (9.8)            | 49.3 (10.0)     | 45.2 (9.8)  | <10 <sup>-4</sup> |
| Reasoning, mean (SD)                        | 53.7 (8.2)            | 47.9 (9.1)      | 36.0 (10.3) | <10 <sup>-4</sup> |
| Vocabulary, mean (SD)                       | 53.5 (7.8)            | 48.1 (9.3)      | 36.4 (12.7) | <10 <sup>-4</sup> |
| Phonemic fluency, mean (SD)                 | 52.3 (9.8)            | 48.5 (9.3)      | 42.3 (9.9)  | <10 <sup>-4</sup> |
| Semantic fluency, mean (SD)                 | 52.4 (9.6)            | 48.7 (9.3)      | 40.9 (10.2) | <10 <sup>-4</sup> |
| MMSE, mean (SD)                             | 50.8 (9.2)            | 50.0 (10.0)     | 44.2 (13.0) | <10 <sup>-4</sup> |

\* A chi-square test for heterogeneity (for categorical variables) and ANCOVA (for continuous variables) was used.

Table B. Association between the cumulative exposure to the metabolic syndrome over the 10-year follow-up and cognitive performances at phase 7.

| Mean differences of cognitive T-score across cumulative exposure to the metabolic syndrome |       |                |             |      |            |              |        |                                                   |                |             |      |            |             |      |
|--------------------------------------------------------------------------------------------|-------|----------------|-------------|------|------------|--------------|--------|---------------------------------------------------|----------------|-------------|------|------------|-------------|------|
| Fully adjusted * model with education                                                      |       |                |             |      |            |              |        | Fully adjusted * model with occupational position |                |             |      |            |             |      |
|                                                                                            | Never | Non persistent |             |      | Persistent |              |        | Never                                             | Non persistent |             |      | Persistent |             |      |
|                                                                                            |       | $\delta m$     | 95 % CI     | p    | $\delta m$ | 95 % CI      | p      |                                                   | $\delta m$     | 95 % CI     | p    | $\delta m$ | 95 % CI     | p    |
| Memory                                                                                     | ref   | -0.17          | -1.13; 0.80 | 0.74 | -0.92      | -2.01; 0.18  | 0.10   | ref                                               | -0.19          | -1.16; 0.78 | 0.70 | -0.58      | -1.67; 0.52 | 0.30 |
| Reasoning                                                                                  | ref   | -0.09          | -0.96; 0.78 | 0.84 | -0.78      | -1.77; 0.20  | 0.12   | ref                                               | -0.23          | -1.10; 0.63 | 0.60 | -0.007     | -1.00; 0.98 | 0.99 |
| Vocabulary                                                                                 | ref   | -0.34          | -1.21; 0.53 | 0.44 | -1.89      | -2.87; -0.90 | 0.0002 | ref                                               | -0.46          | -1.35; 0.44 | 0.32 | -1.08      | -2.09; 0.06 | 0.04 |
| Phonemic fluency                                                                           | ref   | -0.34          | -1.30; 0.62 | 0.49 | -0.75      | -1.84; 0.34  | 0.18   | ref                                               | -0.43          | -1.39; 0.52 | 0.37 | -0.24      | -1.32; 0.84 | 0.66 |
| Semantic fluency                                                                           | ref   | -0.24          | -1.18; 0.70 | 0.62 | -1.30      | -2.37; -0.24 | 0.02   | ref                                               | -0.32          | -1.25; 0.62 | 0.51 | -0.77      | -1.83; 0.30 | 0.16 |
| MMSE                                                                                       | ref   | -0.53          | -1.53; 0.47 | 0.30 | -0.67      | -1.80; 0.46  | 0.25   | ref                                               | -0.62          | -1.62; 0.37 | 0.22 | -0.36      | -1.49; 0.77 | 0.53 |

$\delta m$  –Mean differences of cognitive T-score with their 95% Confidence intervals across the cumulative exposure to the metabolic syndrome compared to the reference group

\* model adjusted for demographics (age, sex marital status) behavioural health factors (smoking status, alcohol consumption, physical activity) and health status (CHD prevalence and depressive symptoms)
